# Supplementary material for: Daytime variation in the aerosol indirect effect for warm marine boundary layer clouds in the eastern North Atlantic
Source: Copernicus journal article supplement (doi:10.5194/acp-24-2913-2024), 2024-03-06
Supplement: Supplementary file 1 [file acp-24-2913-2024-supplement.pdf]

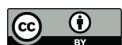

*Supplement of*

## **Daytime variation in the aerosol indirect effect for warm marine boundary layer clouds in the eastern North Atlantic**

**Shaoyue Qiu et al.**

*Correspondence to:* Shaoyue Qiu (qiu4@lnl.gov)

The copyright of individual parts of the supplement might differ from the article licence.

1    **Supplementary information**

2  
3  
4  
5  
6  
7

This file includes:  
Supplementary text  
Figs. S1 to S5

8    **Supplementary Text**

9    Evaluation of Meteosat-11 cloud mask with ARM ground-based observations.

10    As the cloud fraction (CF) in Meteosat is defined as areal fraction of each time step, while CF from the ground-based radar-lidar  
11    observations is defined as the percentage of time when clouds are detected. To enable comparison, we calculate the CF from  
12    Meteosat over a  $0.5^{\circ} \times 0.5^{\circ}$  grid box centered at the ground site. For ground-based observations, CF is computed over a one-  
13    hour period centered at each Meteosat cycle (e.g., Dong et al., 2002, 2016; Xi et al., 2010). Since Meteosat is unable to observe  
14    low clouds below an upper cloud layer, boundary layer clouds in ARM ground-based observations are defined as clouds with the  
15    radar detected uppermost cloud tops below 3km to be consistent with satellite definition. In Figure S1, we present the average  
16    diurnal variation in boundary layer clouds derived from Meteosat and ARM ground-based observation during the study period  
17    from 2018 to 2021 in July.

18  
19

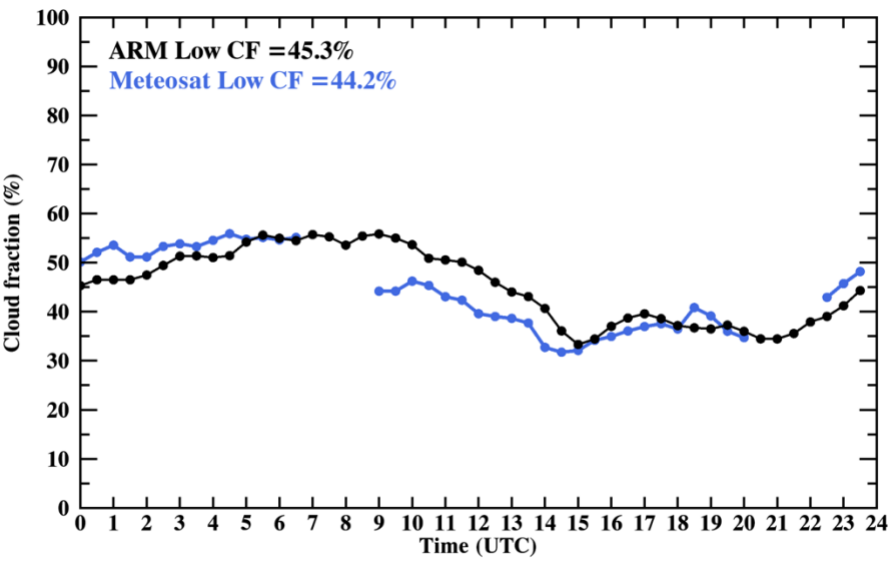

Figure S1: Diurnal variation in boundary layer cloud fraction derived from the ground-based radar-lidar-ceilometer measurements at the Atmospheric Radiation Measurement Eastern North Atlantic (ARM ENA) site (black line) and from Meosot-11 (blue line).

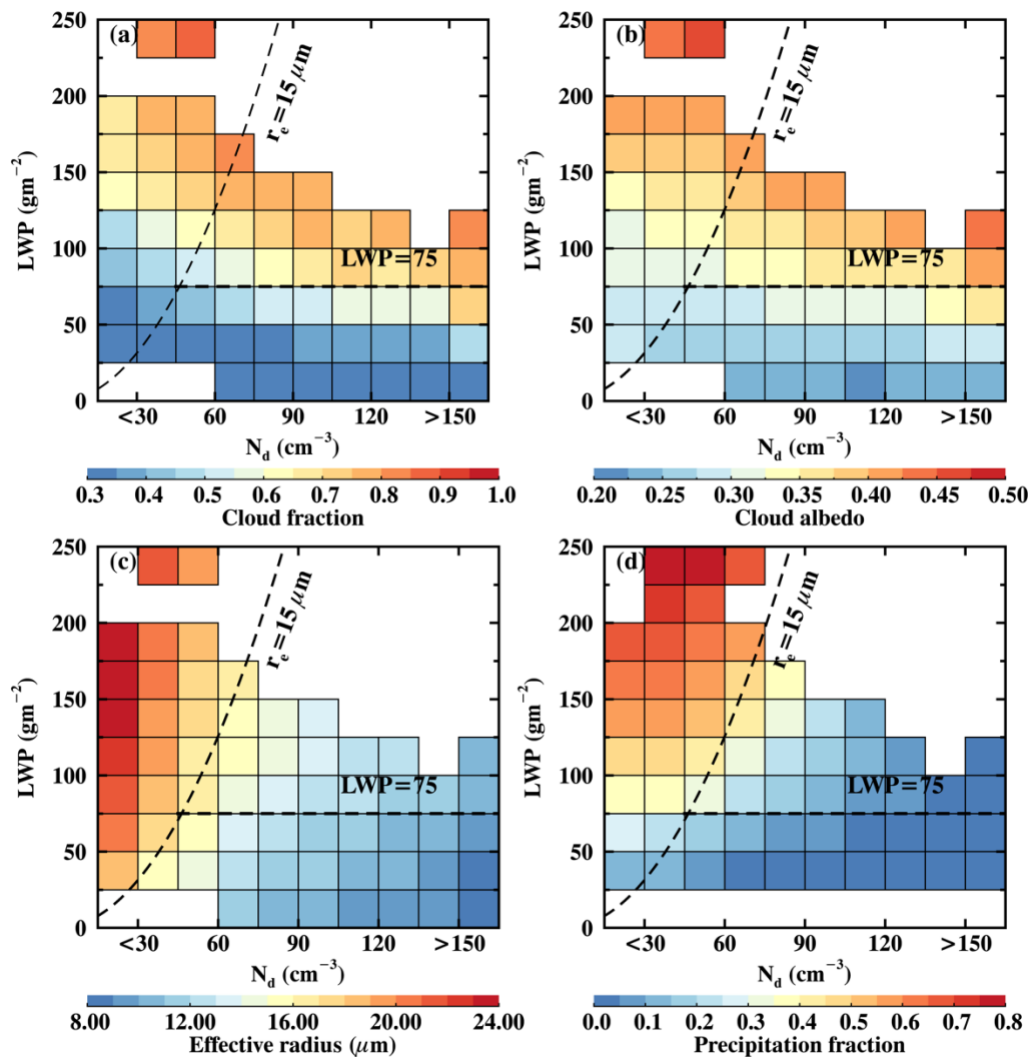

Figure S2. Daytime mean cloud properties for different  $N_d$  and LWP bins. (a) cloud fraction (b) cloud albedo, (c) effective radius, and (d) pixel-level precipitation fraction. The dashed lines indicate  $r_e = 15 \mu\text{m}$  and  $\text{LWP} = 75 \text{ gm}^{-2}$ , as thresholds for precipitation (precipitating clouds located to the left of the line) and thick clouds (with  $\text{LWP} > 75 \text{ gm}^{-2}$ ).

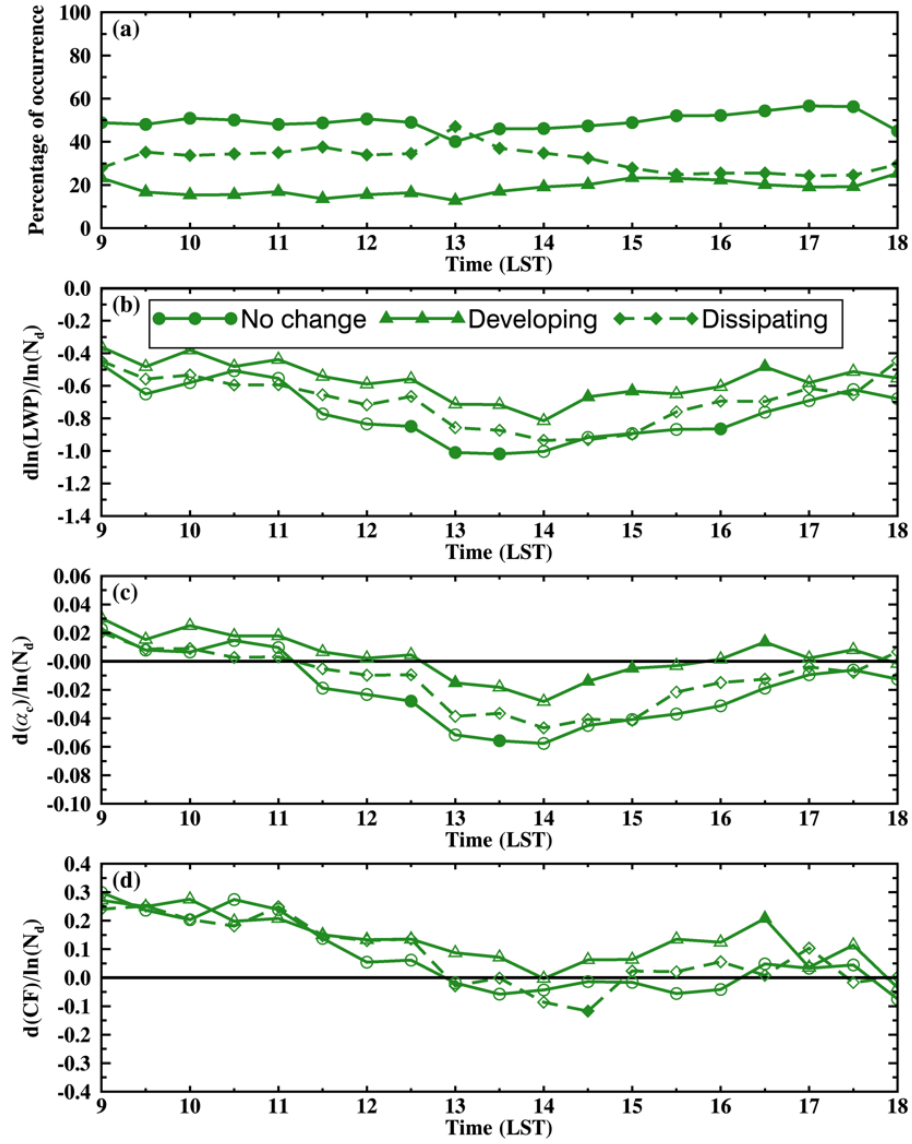

Figure S3. Daytime variation in non-precipitating thin clouds that have small changes in the  $1^\circ \times 1^\circ$  mean cloud fraction (CF) (No change, solid line with circle symbols), with an increase in the mean CF (developing, solid line with triangle symbols), and with a decrease in the mean CF (dissipating, dash line with diamond symbols) within a 30-minute window. (a) Percentage of occurrence for the three groups above, (b) cloud LWP susceptibility ( $d\ln(LWP)/d\ln(N_d)$ ), (c) cloud albedo susceptibility ( $d\alpha_c/d\ln(N_d)$ ), and (d) cloud fraction susceptibility ( $dCF/d\ln(N_d)$ ) for non-precipitating thin clouds. Symbols representing different cloud stages are noted in (b). In (b)–(d), filled markers indicate data points that are significantly different from the other two groups ( $p < 0.05$ ). Open markers indicate statistical insignificance.

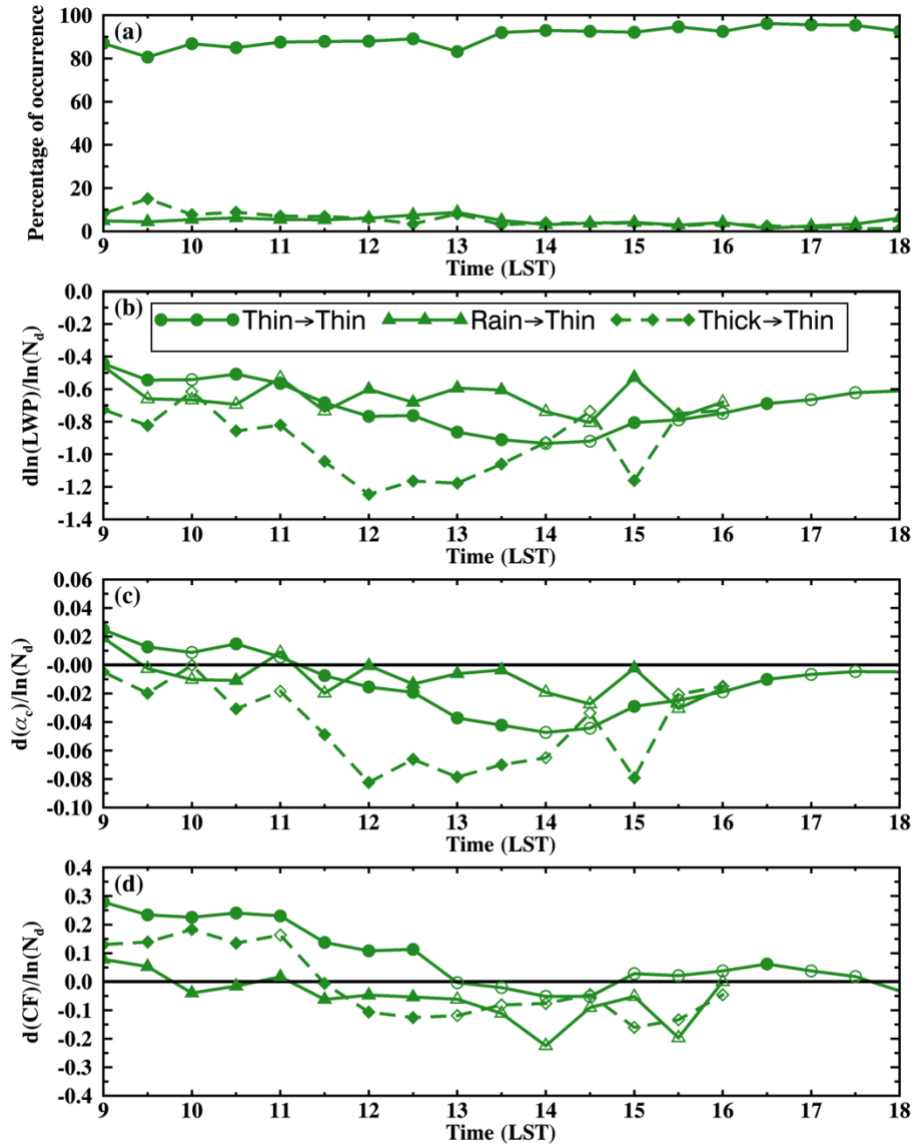

Figure S4. Daytime variation in non-precipitating thin clouds transition from non-precipitating thin clouds (thin → thin, solid line with circle symbols), precipitating clouds (rain → thin, solid line with triangle symbols), and non-precipitating thick clouds (thick → thin, dash line with diamond symbols) in previous half an hour. (a) Percentage of occurrence for the three groups above, (b) cloud LWP susceptibility ( $d\ln(LWP)/d\ln(N_d)$ ), (c) cloud albedo susceptibility ( $d\alpha_c/d\ln(N_d)$ ), and (d) cloud fraction susceptibility ( $d(CF)/d\ln(N_d)$ ) for non-precipitating thin clouds. Symbols for different state transitions are noted in (b). In (b)–(d), filled markers indicate data points that are significantly different from the other two groups ( $p < 0.05$ ), while open markers indicate statistical insignificance.

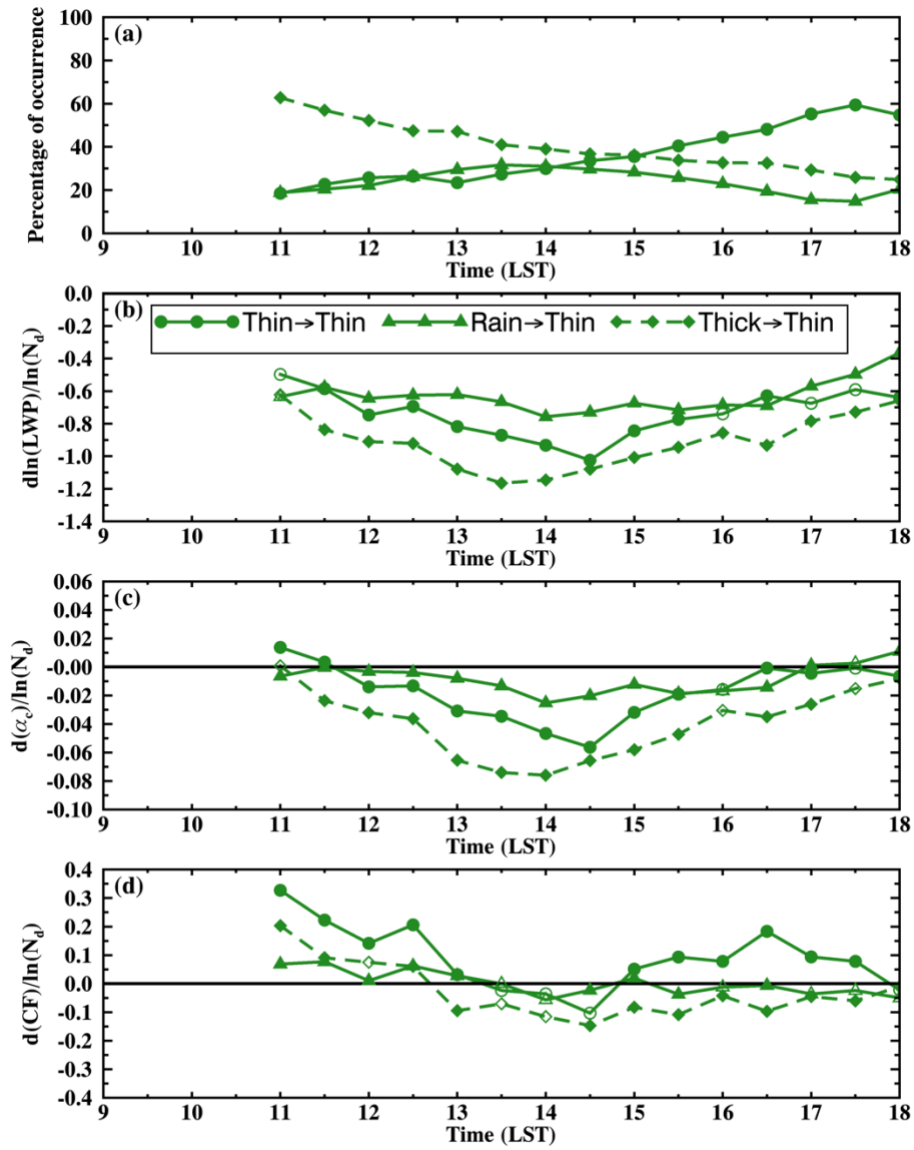

Figure S5. Daytime variation in non-precipitating thin clouds transition from non-precipitating thin clouds (thin → thin, solid line with circle symbols), precipitating clouds (rain → thin, solid line with triangle symbols), and non-precipitating thick clouds (thick → thin, dash line with diamond symbols) in previous four hours. (a) Percentage of occurrence for the three groups above, (b) cloud LWP susceptibility ( $d\ln(LWP)/d\ln(N_d)$ ), (c) cloud albedo susceptibility ( $d\alpha_c/d\ln(N_d)$ ), and (d) cloud fraction susceptibility ( $d(CF)/d\ln(N_d)$ ) for non-precipitating thin clouds. Symbols for different state transitions are noted in (b). In (b)–(d), filled markers indicate data points that are significantly different from the other two groups ( $p < 0.05$ ), while open markers indicate statistical insignificance. The lack of definition of cloud state transition between 9-11 LST is due to filtering of cloud retrievals with the SZA threshold.
